# Supplementary material
Source: Elsevier journal article supplement (https://drewscherer.angelfire.com/MMC04.pdf)
Supplement: MMC04 [file MMC04.pdf]

**THE INSURANCE SERVICE STATION**  
 Protection For Your Home, Auto, Life and Business. Call one of our agents at: **223-0022**  
 Slocum-Lauder Agency, Inc.  
 99 S. Main St. Fairport



**Dr. Benjamin A. Caruso**  
 Fairport Chiropractic

**Personalized Family Care**

- Headaches
- Neck, shoulder, arm pain
- Nervousness
- Numbness in hands & feet
- Painful Joints
- Pain between shoulders
- Disc Injuries
- Low back & leg pain

**381-7724**

1157 Fairport Road, Fairport NY Most Insurance Accepted



**Sort it. Store it. Recycle it with Collector's Edition**

Prices starting at **\$179<sup>95</sup>**



**THE BARN YARD**  
 Pole Buildings, Garages, Camps, Storage Sheds  
 Rte 104, Ontario 315-524-7477

**SUBSCRIBE To The FAIRPORT-PERINTON HERALD MAIL only \$11.00 per year**

NAME: \_\_\_\_\_  
 ADDRESS: \_\_\_\_\_  
 \_\_\_\_\_  
 \_\_\_\_\_  
 PHONE: \_\_\_\_\_

Circle One: *New* *Renewal*  
**\$2.00 Senior Citizen Discount**  
 Add \$1.50 to out-of-county subscriptions

**EMPIRE STATE WEEKLIES**  
 2010 Empire Blvd.  
 Webster, New York 14580  
 (716) 671-1533 or 671-3554



## Music students earn honors

Four Fairport students received honors at the Young Artists Auditions at the Eastman School of Music in March. Johanna Cox, who plays oboe, won the Eisenhart Awards for winds and her twin sister Lenora, who plays violin, won the Albright Award for strings. They will now have the opportunity for solo performances with the Rochester Philharmonic Orchestra. Both young artists have participated in the Fairport Central School District music program for several years. Johanna and Lenora are the daughter of Mr. and Mrs. John Cox, Watson Road.

Also receiving audition honors were Mamatha Kamath and Karen Seidel. Mamatha was a co-first runner for the Ranlet Piano Award, and Karen, who plays the flute, placed second for the Eisenhart Award. Karen was selected

to play on the "Live from Hochstein" broadcast on WXXI. Mamatha is the daughter of Mr. and Mrs. Venkatesh Kamath, Taunton Gap; Karen is the daughter of Mr. and Mrs. William Seidel, Brentwood Lane.

All four students were honored at an Awards Recital April 8 at the Rochester Memorial Art Gallery.

### FHS PTSA

The next Fairport High School PTSA meeting is at 7:30 p.m., Tuesday, April 24 at 1 American Place, Perinton Hills Mall. Anyone interested is welcome to attend.

**Subscribe!**  
**671-3554**

## Donaldson memorial fund established

A scholarship in memory of 1981 Fairport High School graduate Jack Donaldson has been established by former classmates Hal Miller and Mark Tiberio.

Jack's mother, Jan Donaldson; principal Lyman Cook; and music directors Lonny Arnold, Ken Brown, Larry Poole, and Bill Tiberio.

The recipient will be a graduating senior from the Fairport High Music Department who possesses high moral and ethical standards, outstanding academic achievements, and participates actively in extracurricular endeavors.

Miller and Mark Tiberio hope to raise \$1,000 for the fund. Donations should be sent to: Music Department, Fairport High School, Jack Donaldson Memorial Fund, 1359 Ayrault Road, Fairport, 14450.

The selection committee consists of

Checks should be made payable to the Jack Donaldson Memorial Fund.

## Obituaries

### Margaret Monihan

Mass of Christian Burial for Margaret M. Monihan, who died April 10, 1990, was celebrated Monday morning from Assumption of Our Lady Church. She was 81.

Miss Monihan, the daughter of the late Frank and Mary Murphy Monihan, had been in ill health for several months.

She is survived by her sister, Mary Cross of Fairport; her nephew, James Cross; and two great-nephews.

Friends may contribute to the Perinton Ambulance Corps in memory of Miss Monihan.

Arrangements were made by the Richard H. Keenan Funeral Home.

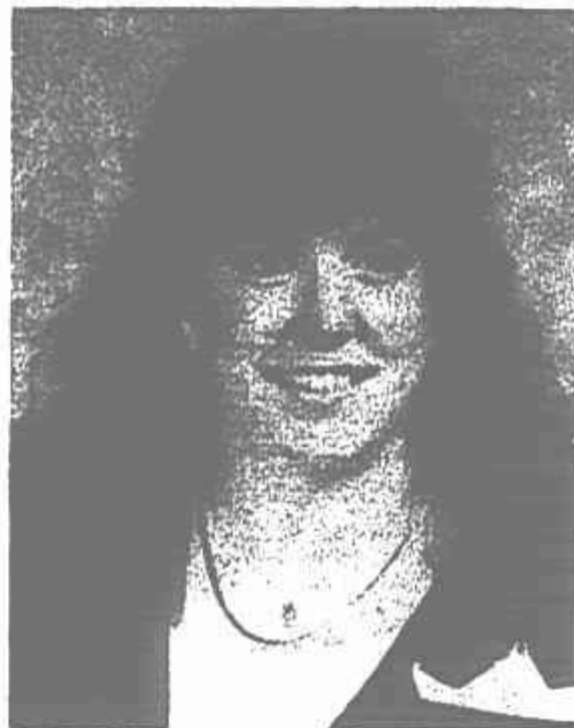

ELIZABETH ANNE (Buffy) Payne of Fairport will graduate from Syracuse University in May as an elementary education major with an emphasis on special education. She earned Dean's List honors during her final semesters and achieved superior recognition in music, practice teaching and the Tau Beta Sigma National Honor Band Sorority. She recently served as trumpet section leader for the traveling Sour Citrus Pep Basketball Band.

**SUBSCRIBE!**  
**671-3554**  
 FAX 671-7067

## Service

Army National Guard Spec. Michael R. Smith has graduated from the Tubelaunch Optical Wire and Dragon weapon systems repair course at the U.S. Army Missile and Munitions Center and School, Redstone Arsenal, Alabama. The course provides instruction for students to test, detect and repair the TOW and Dragon weapon systems and related equipment. During the 19 weeks of training, students were also instructed in basic electronics.

He is the son of Wendelene E. Smith of 38 Brier Springs Dr., Conway, Arkansas. His wife, Mechele, is the daughter of Jeanne L. Lokar of 131 Roselawn Crest, Fairport.

## JOB OPPORTUNITIES

### "THE CAN-DO-IT COMPANY"

Major international corporation offers long term assignments in Webster and East Rochester:

- |                                                                                          |                                                |
|------------------------------------------------------------------------------------------|------------------------------------------------|
| <b>SALES/TELEMARKETING</b>                                                               | <b>COPIER PERFORMANCE</b>                      |
| • entry level positions for ambitious professionals with excellent communications skills | • entry level                                  |
| • growth potential                                                                       | • monitor copier performance and trouble shoot |

ENJOY BENEFITS AND BONUSES!  
 CALL TODAY FOR AN IMMEDIATE INTERVIEW
